# Supplementary material
Source: publisher figshare collection journal article supplement (https://acs.figshare.com/ndownloader/files/3993025)
Supplement: Supplementary file 1 [file 3993025]

# Supporting Information

**One-pot facile synthesis of ant-cave-structured metal oxide–carbon  
microballs by continuous process for use as anode materials in Li-ion  
batteries**

*You Na Ko,<sup>1,2</sup> Seung Bin Park,<sup>2</sup> Kyeong Youl Jung,<sup>3</sup> and Yun Chan Kang,<sup>1,\*</sup>*

**This file includes:**

- Experimental details
- Schematic diagram of the ultrasonic spray pyrolysis system.
- Crystal structures and morphologies of the precursor  $\text{MoO}_x$  and  $\text{MoO}_x\text{--C}$  composite powders directly prepared by spray pyrolysis
- Cycling performances of the precursor  $\text{MoO}_x$  and  $\text{MoO}_x\text{--C}$  composite powders directly prepared by spray pyrolysis at a constant current density of  $2\text{ A g}^{-1}$ .
- XRD patterns of the post-treated powders at  $300^\circ\text{C}$  under an air atmosphere.
- Thermogravimetric curve of the ant-cave-structured  $\text{MoO}_3\text{--C}$  microballs.
- TEM and dot-mapping images of ant-cave-structured  $\text{MoO}_3\text{--C}$  composite microballs at a fully charged state after 100 cycles.
- Nyquist plots of the electrochemical impedance spectra.
- Relationship between  $Z_{re}$  and  $\omega^{-1/2}$  in the low-frequency region.
- SEM images of the precursor, and powders post-treated at different temperatures under a  $\text{N}_2$  atmosphere for 3 h.
- Morphologies of the filled-structured  $\text{MoO}_3\text{--C}$  composite microballs.
- Pore size distributions of the ant-cave and filled-structured  $\text{MoO}_3\text{--C}$  composite microballs calculated by the Barrett–Joyner–Halenda (BJH) method from the adsorption isotherms.
- Pore size distributions determined by mercury porosimetry of the ant-cave and filled-structured  $\text{MoO}_3\text{--C}$  composite microballs.
- Cyclic voltammograms of the second cycles at a scan rate of  $0.1\text{ mV s}^{-1}$ .
- Discharge/charge voltage profiles of the second cycles at a constant current density of  $2\text{ A g}^{-1}$ .
- Electrochemical properties of  $\text{MoO}_x$  material with different morphologies.

## Experimental details

**Synthesis of MoO<sub>3</sub> and MoO<sub>3</sub>–C powders.** Ant-cave-structured molybdenum oxide–carbon composite microballs were prepared through one-pot spray pyrolysis using polystyrene (PS) beads as a template. A schematic diagram of the ultrasonic spray pyrolysis system used for the synthesis of the molybdenum oxide powders is shown in Figure S1. A 1.7-MHz ultrasonic spray generator consisting of six vibrators was used to generate a large number of droplets, which were then carried to a quartz reactor by N<sub>2</sub> carrier gas. The quartz reactor used had a length and diameter of 1,200 and 50 mm, respectively. The reactor temperature and flow rate of carrier gas were fixed at 900°C and 10 L min<sup>-1</sup>, respectively. An aqueous spray solution was prepared by dissolving 0.1 M of MoO<sub>3</sub> and 0.1 M of sucrose in a mixture of hydrogen peroxide and distilled water by heating. Sucrose was used as the carbon source to form the molybdenum oxide–carbon composite powders. Finally, PS nanobeads were added to the clear solution, in a weight ratio of 2:1 with respect to MoO<sub>3</sub>. To investigate the effects of gas atmosphere and sucrose on powder properties, the same synthesis procedures were performed under both air and N<sub>2</sub> atmospheres but without the addition of sucrose in the colloidal spray solutions. The as-prepared precursor powders were post-treated at 300°C for 3 h under an air atmosphere to obtain powders with the same crystal structures and to improve their electrochemical properties.

**Characterizations.** The morphologies of the molybdenum oxide powders prepared by spray pyrolysis were investigated through scanning electron microscopy (SEM, JEOL JSM-6060), field-emission scanning electron microscopy (FE-SEM, Hitachi S-4800), and transmission electron microscopy (FE-TEM, JEOL-2100F). The cross-sections of the ant-cave-structured MoO<sub>3</sub> microballs were investigated by applying a cross-section polisher (CP, JEOL SM-09010). For CP samples, the powders were mounted into an epoxy resin and carefully polished to expose the cross-section of the powders. Thermal gravimetric analysis (TGA, SDT Q600) was performed in air at a heating rate of 10°C min<sup>-1</sup> to determine the amount of carbon in the powders. The crystal structures of the powders were investigated by X-ray diffractometry (XRD, X'Pert PRO MPD) using Cu K $\alpha$  radiation ( $\lambda$  = 1.5418 Å) at the Korea Basic Science Institute (Daegu). The porosities of the powders were measured by mercury porosimeter (Auto Pore IV 9500). The surface areas of the powders were measured by the Brunauer-Emmett-Teller (BET) method using N<sub>2</sub> as the adsorbate gas.

**Electrochemical Measurements.** The electrochemical properties of the molybdenum oxide powders were analyzed in a 2032-type coin cell. The anode was prepared from a

mixture of the active material, carbon black, and sodium carboxymethyl cellulose (CMC) in a weight ratio of 7:2:1. Li metal and a microporous polypropylene film were used as the counter electrode and separator, respectively. The electrolyte was 1 M  $\text{LiPF}_6$  dissolved in a mixture of fluoroethylene carbonate/dimethyl carbonate (FEC/DMC; 1:1 v/v). The discharge/charge characteristics of the samples were investigated through cycling in the voltage range 0.001–3 V at various current densities. Cyclic voltammograms were measured at a scan rate of  $0.1 \text{ mV s}^{-1}$ . Electrochemical impedance spectra was determined using AC electrochemical impedance spectroscopy (EIS) with a VersaSTAT4 over a frequency range of 0.02 Hz–100 kHz and potential amplitude of 10 mV.

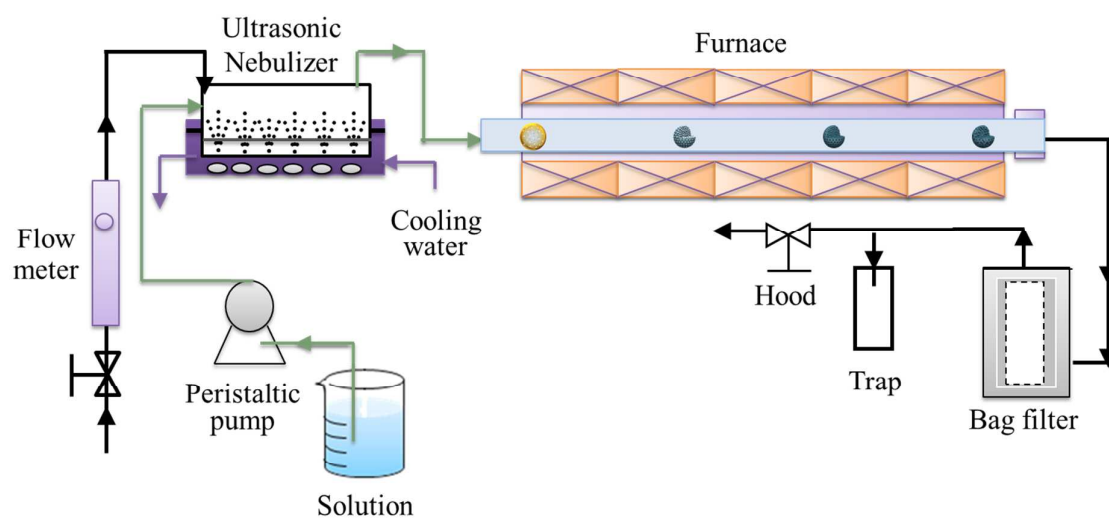

**Figure S1.** Schematic diagram of the ultrasonic spray pyrolysis system.

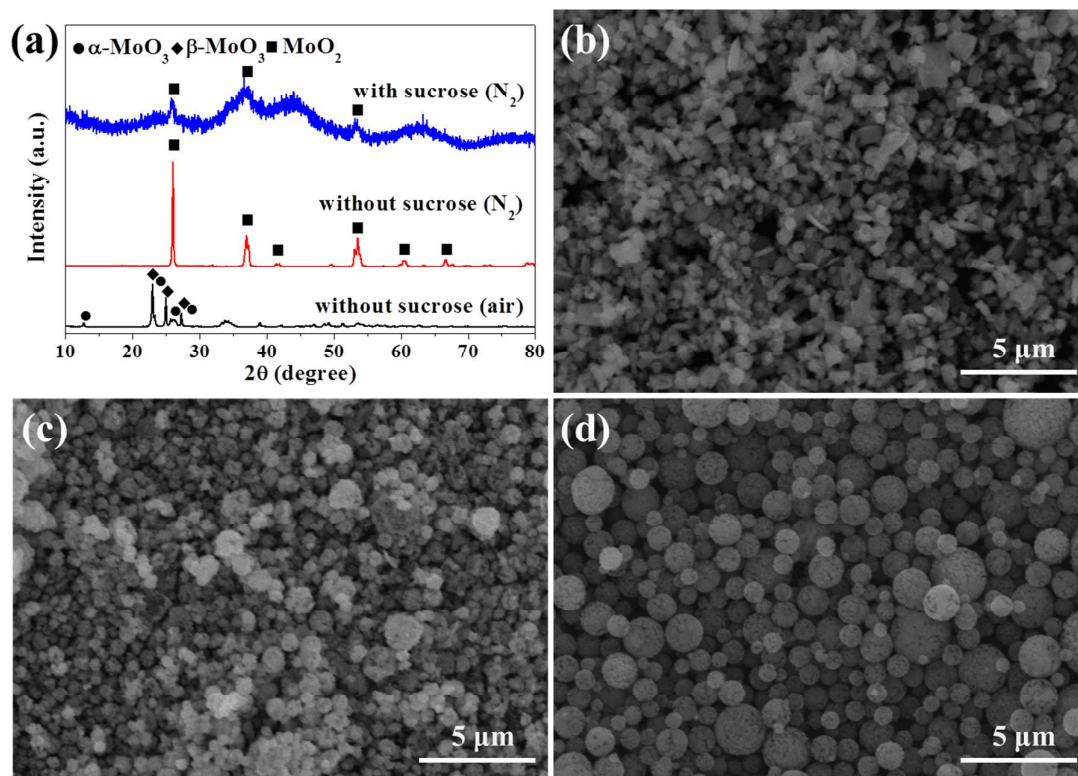

**Figure S2.** Crystal structures and morphologies of the precursor  $\text{MoO}_x$  and  $\text{MoO}_x\text{-C}$  composite powders directly prepared by spray pyrolysis: (a) XRD pattern, (b) SEM image of the  $\text{MoO}_x$  powders without sucrose under an air atmosphere, (c) SEM image of the  $\text{MoO}_x$  powders without sucrose under a  $\text{N}_2$  atmosphere, and (d) SEM image of the  $\text{MoO}_x\text{-C}$  composite powders with sucrose under a  $\text{N}_2$  atmosphere.

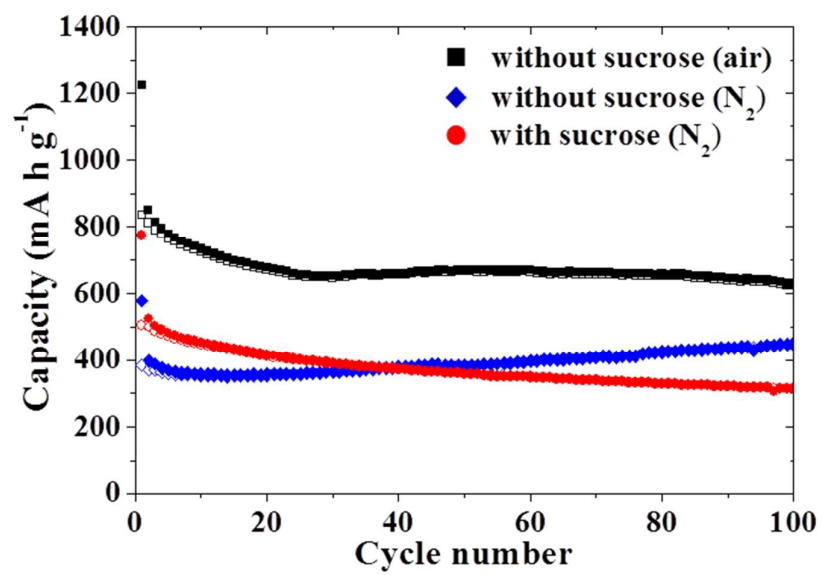

**Figure S3.** Cycling performances of the precursor MoO<sub>x</sub> and MoO<sub>x</sub>-C composite powders directly prepared by spray pyrolysis at a constant current density of 2 A g<sup>-1</sup>.

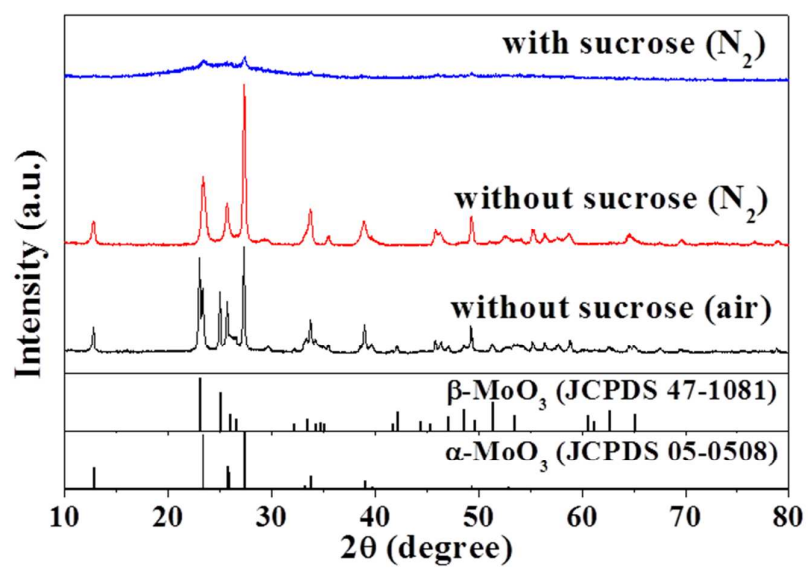

**Figure S4.** XRD patterns of the post-treated powders at  $300^\circ\text{C}$  under an air atmosphere.



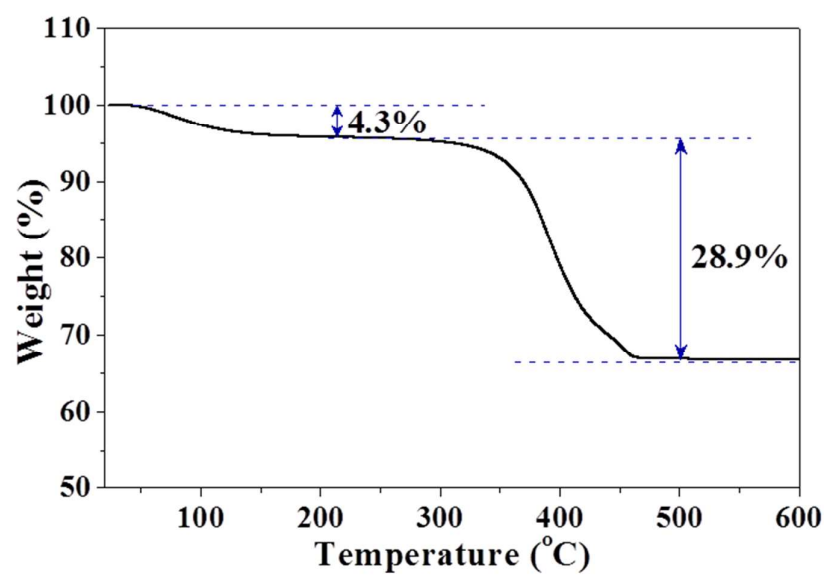

**Figure S5.** Thermogravimetric curve of the ant-cave-structured MoO<sub>3</sub>-C microballs.

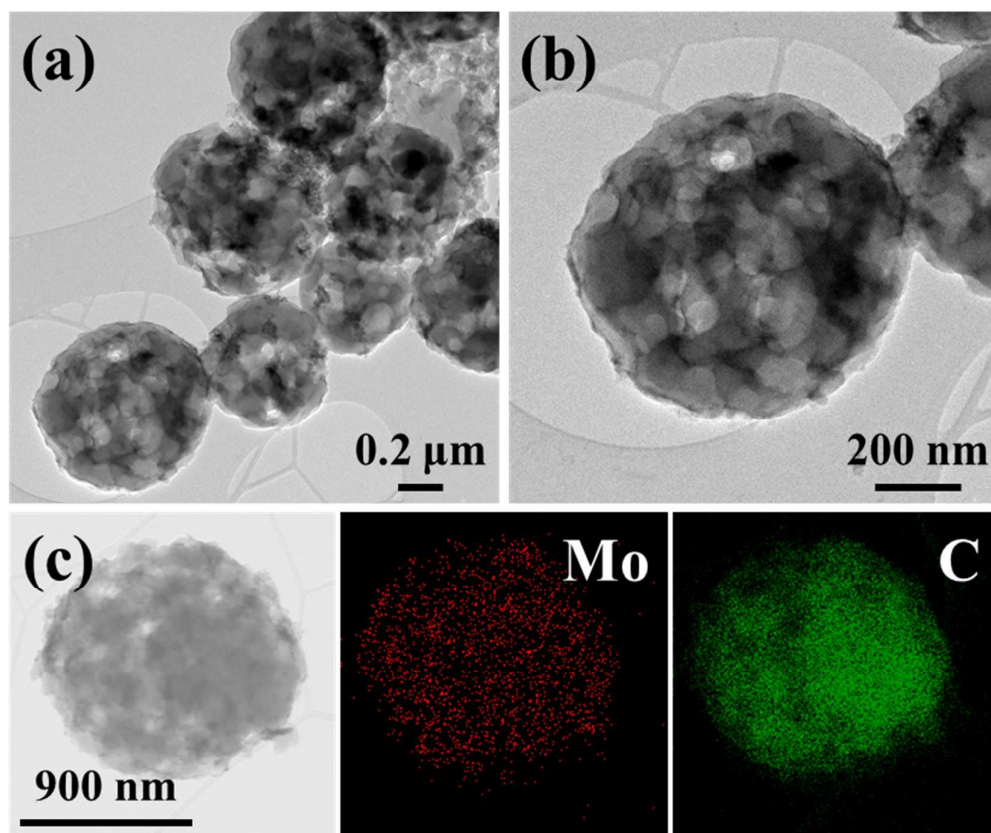

**Figure S6.** TEM and dot-mapping images of ant-cave-structured  $\text{MoO}_3\text{-C}$  composite microballs at a fully charged state after 100 cycles: (a) and (b) TEM images, and (c) dot-mapping images.

The electrochemical impedance spectra of the ant-cave-structured  $\text{MoO}_3\text{-C}$  composite microballs, well-faceted crystalline  $\text{MoO}_3$  powders, and spherical  $\text{MoO}_3$  powders were analyzed both before and after 100 cycles. The Nyquist plots (EIS spectra) as shown in Figure S7 show compressed semicircles in the medium frequency range of each spectrum, which describe the charge transfer resistance ( $R_{ct}$ ) for these electrodes, and an approximately  $45^\circ$  inclined line in the low-frequency range, which could be considered as Warburg impedance ( $Z_w$ ), which is associated with the lithium-ion diffusion in the bulk of the active material.

The radius of the ant-cave-structured  $\text{MoO}_3\text{-C}$  composite microballs was found to be smaller than that of the  $\text{MoO}_3$  powders before cycling, which indicates that the charge-transfer resistance ( $R_{ct}$ ) of the ant-cave-structured  $\text{MoO}_3\text{-C}$  composite microballs was lower. The  $R_{ct}$  of the ant-cave-structured  $\text{MoO}_3\text{-C}$  composite microballs changed slightly after 100 cycles, however, with both of the  $\text{MoO}_3$  powders the  $R_{ct}$  significantly increased. The values of  $R_{ct}$  for the ant-cave-structured  $\text{MoO}_3\text{-C}$  composite microballs, well-faceted crystalline  $\text{MoO}_3$  powders, and spherical  $\text{MoO}_3$  powders after 100 cycles were calculated to be 19, 92, and 123  $\Omega$ , respectively.

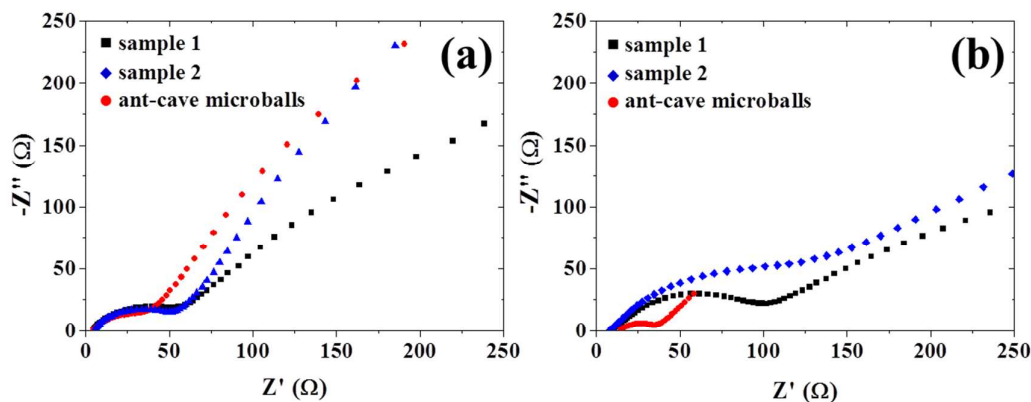

**Figure S7.** Nyquist plots of the electrochemical impedance spectra for ant-cave-structured  $\text{MoO}_3\text{-C}$  composite microballs, well-faceted crystalline  $\text{MoO}_3$  powders (sample 1), and spherical  $\text{MoO}_3$  powders (sample 2): (a) before cycling and (b) after 100 cycles at a rate of 2  $\text{A g}^{-1}$ .

The lithium diffusion coefficient can also be calculated by using the following equation:<sup>S1-S4</sup>

$$D = R^2 T^2 / 2 A^2 n^4 F^4 C^2 \sigma^2 \quad (1)$$

where  $R$  is the gas constant,  $T$  is the absolute temperature,  $A$  is the surface area of the anode,  $n$  is the number of electrons transferred in the half-reaction for the redox couple,  $F$  is the Faraday constant,  $C$  is the concentration of Li ions in the solid,  $D$  is the diffusion coefficient ( $\text{cm}^2 \text{s}^{-1}$ ), and  $\sigma$  is the Warburg factor, which is relative to  $Z_{re}$ . From the slope of the lines in the inset of Figure 3b  $\sigma$  can be obtained.<sup>S1-S4</sup>

$$Z_{re} = R_D + R_L + \sigma \omega^{-1/2} \quad (2)$$

Figure S8 shows the relationship between  $Z_{re}$  and  $\omega^{-1/2}$  in the low-frequency region. According to the linear fitting, the slopes of the real part of the complex impedance versus  $\omega^{-1/2}$  for the ant-cave-structured  $\text{MoO}_3\text{-C}$  composite microballs, well-faceted crystalline  $\text{MoO}_3$  powders, and spherical  $\text{MoO}_3$  powders after 100 cycles were 30.1, 131.7, and 422.6, respectively. The lithium diffusion coefficients at  $25^\circ\text{C}$  were calculated to be  $2.82 \times 10^{-10}$ ,  $1.48 \times 10^{-11}$ , and  $1.43 \times 10^{-12} \text{ cm}^2 \text{s}^{-1}$  for the ant-cave-structured  $\text{MoO}_3\text{-C}$  composite microballs, well-faceted crystalline  $\text{MoO}_3$  powders, and spherical  $\text{MoO}_3$  powders, respectively.

The ant-cave-structured  $\text{MoO}_3\text{-C}$  composite microballs present smaller charge transfer resistance and higher lithium diffusion coefficient than those of the  $\text{MoO}_3$  powders. These are attributable to the fact that the ant-cave-structured  $\text{MoO}_3\text{-C}$  composite microballs are more amenable to the diffusion of  $\text{Li}^+$  ions than  $\text{MoO}_3$  powders.

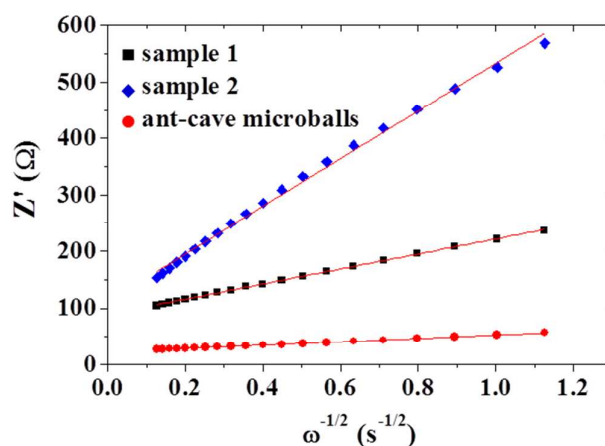

**Figure S8.** Relationship between  $Z_{re}$  and  $\omega^{-1/2}$  in the low-frequency region.

The precursor powders were prepared by spray pyrolysis from a solution containing PS nanobeads, molybdenum salt, and sucrose at 200°C to confirm the formation process for the ant-cave-structured MoO<sub>x</sub>-C microball. This relatively low preparation temperature prevented any decomposition of the PS nanobeads, which are known to decompose at temperatures in excess of 400°C. The morphological change of the powders with varying post-treatment temperatures was subsequently investigated. SEM images of the precursor, and powders post-treated at different temperatures under a N<sub>2</sub> atmosphere for 3 h, are shown in Figure S9.

Precursor powders prepared directly by spray pyrolysis exhibited a smooth surface, without the presence of any open pores. Open pores were however observed on the surface of powder particles post-treated at 500°C, as indicated by the arrows in Figure S9b. The inset on Figure S9b shows a section of fractured powder, which reveals the macroporous structure of the material. These macropores are formed by the decomposition of PS nanobeads at the post-treatment temperature of 500°C. The MoO<sub>x</sub>-C composite powders post-treated at an even higher temperature of 800°C tended to form nanochannels, as indicated by the arrows in Figure S9c, and also exhibited large open pores throughout their surface. Partial melting and sintering of molybdenum oxide at 800°C destroyed the structure of spherical nanovoids, and the networks between these voids are responsible for creating the nanochannels inside the MoO<sub>x</sub>-C composite powder. Consequently, an ant-cave-structured MoO<sub>x</sub>-C microball was formed from a single droplet by one-pot spray pyrolysis, in which macroporous MoO<sub>x</sub>-C powder is first formed as an intermediate product in the front part of a reactor maintained at 900 °C. The macroporous MoO<sub>x</sub>-C composite powder then transformed into an ant-cave-structured MoO<sub>x</sub>-C microball in the rear part of the reactor by partial melting and sintering of molybdenum oxide.

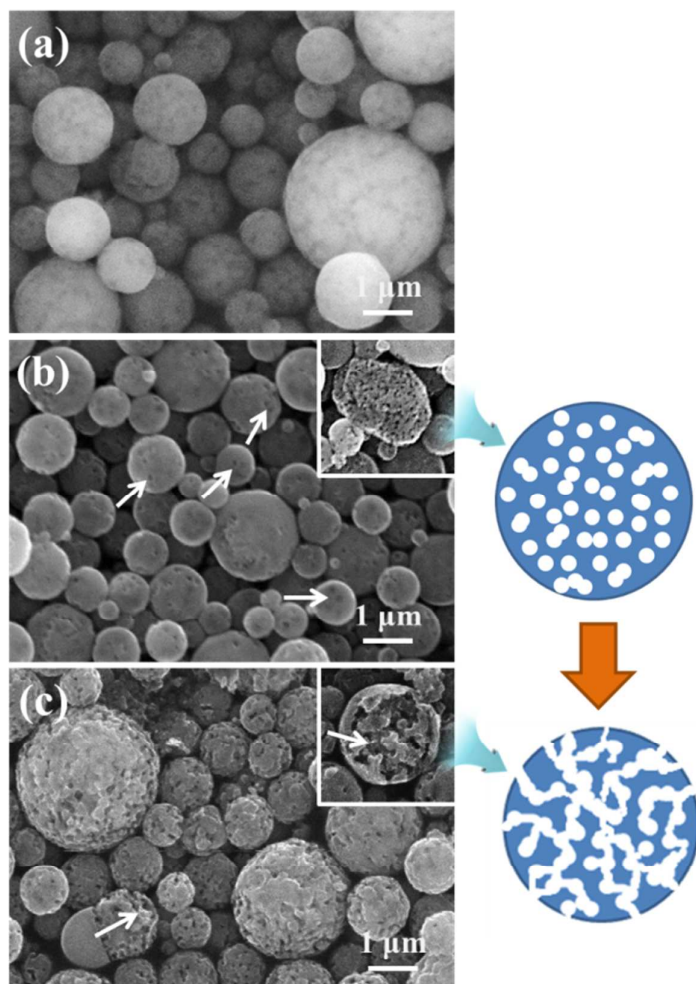

**Figure S9.** SEM images of the precursor, and powders post-treated at different temperatures under a N<sub>2</sub> atmosphere for 3 h. The precursor powders were prepared by spray pyrolysis from a solution containing PS nanobeads, molybdenum salt, and sucrose at a low preparation temperature of 200°C.

The  $\text{MoO}_2\text{-C}$  composite microballs were directly prepared by spray pyrolysis from an aqueous spray solution containing sucrose at  $900^\circ\text{C}$  under a  $\text{N}_2$  atmosphere, in order to show the effect of PS nanobeads. The prepared powders were post-treated at  $300^\circ\text{C}$  under an air atmosphere. Figure S10 show the morphologies of the  $\text{MoO}_3\text{-C}$  composite microballs prepared from a spray solution without PS nanobeads. The crushed powders that are shown in Figure S10b demonstrate the resulting dense structure and absence of channels.

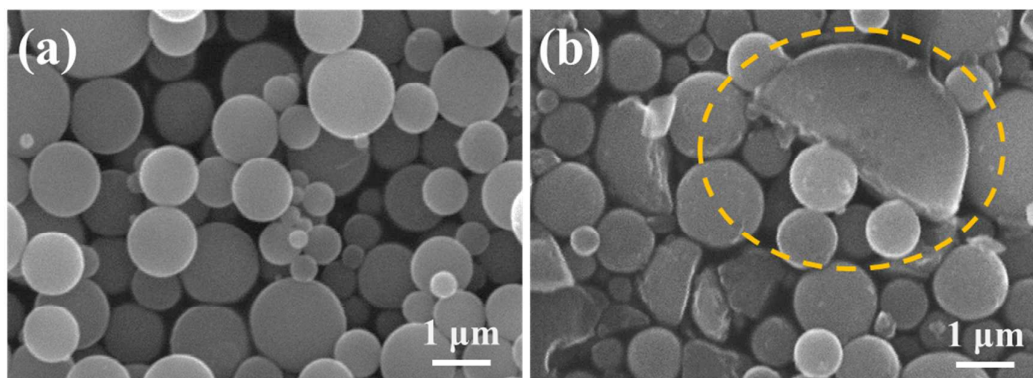

**Figure S10.** Morphologies of the filled-structured  $\text{MoO}_3\text{-C}$  composite microballs prepared directly by spray pyrolysis from the aqueous spray solution with sucrose: (a) before and (b) after crushing by hand using agate mortar.

The  $\text{MoO}_3\text{-C}$  composite microballs prepared from a spray solution with sucrose also contained mesopores a few nanometers in size. Figure S11 shows the pore size distribution of the  $\text{MoO}_3\text{-C}$  composite microballs calculated by the Barrett–Joyner–Halenda (BJH) method from the adsorption isotherms.

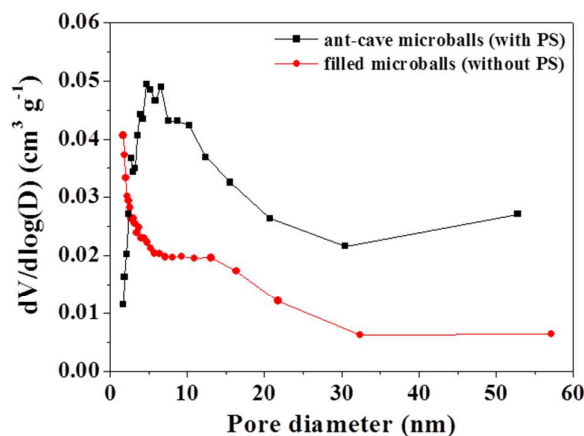

**Figure S11.** Pore size distributions of the ant-cave and filled-structured  $\text{MoO}_3\text{-C}$  composite microballs calculated by the Barrett–Joyner–Halenda (BJH) method from the adsorption isotherms.

The pore size distribution of the ant-cave-structured  $\text{MoO}_3\text{-C}$  microballs was compared to that of the filled-structure  $\text{MoO}_3\text{-C}$  microballs. Figure S12 shows the pore size distributions for both materials, as determined by mercury porosimetry. The ant-cave-structured  $\text{MoO}_3\text{-C}$  microballs exhibit two distinct peaks at around 80 nm and 400 nm, with the former being related to the existence of nanochannels formed by decomposition of the polystyrene nanobeads. This 80 nm peak was not observed in the pore size distribution of the filled  $\text{MoO}_3\text{-C}$  microballs. The macropores detected around 400 nm in both materials can be attributed to gaps between the microballs. The ant-cave and filled-structure  $\text{MoO}_3\text{-C}$  microballs had porosities of 8.8 and 0.5 % within the size range of 3 to 200 nm. It is important to note that the PS nanobeads played a key role in the formation of the ant-cave-structured  $\text{MoO}_3\text{-C}$  microballs.

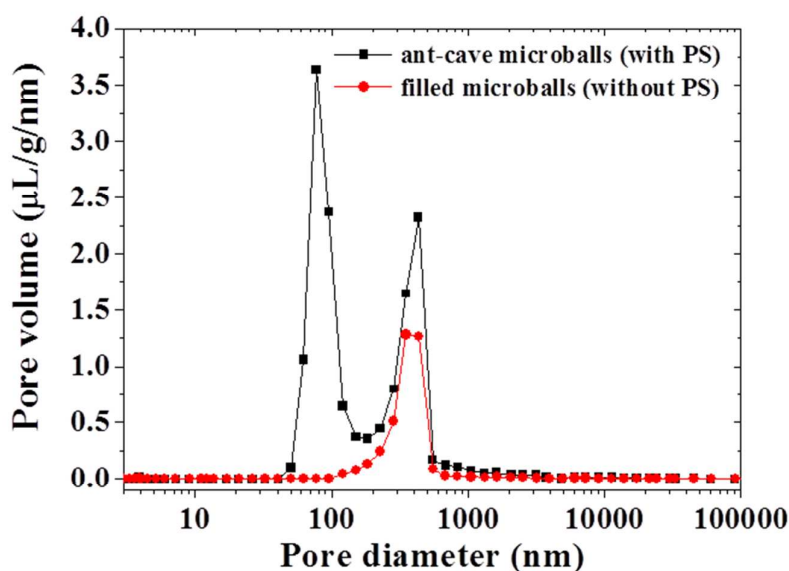

**Figure S12.** Pore size distributions determined by mercury porosimetry of the ant-cave and filled-structured  $\text{MoO}_3\text{-C}$  composite microballs.



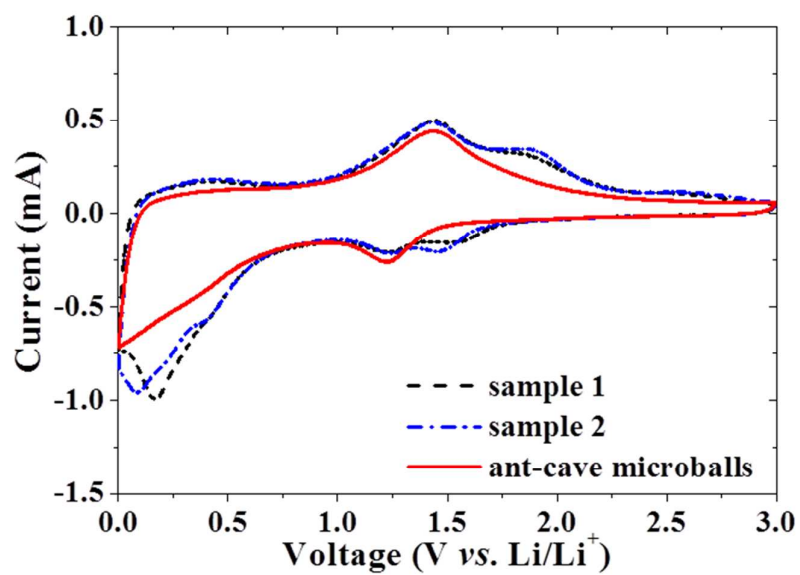

**Figure S13.** Cyclic voltammograms of the second cycles at a scan rate of  $0.1 \text{ mV s}^{-1}$ .

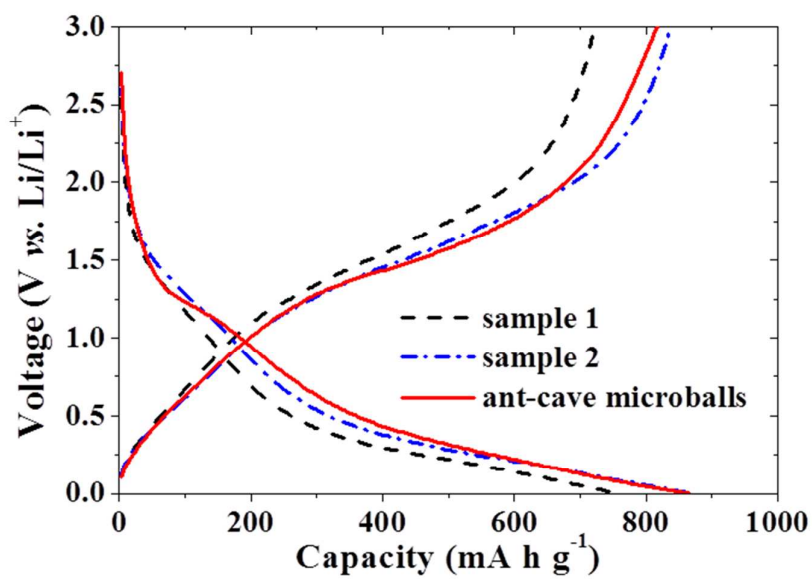

**Figure S14.** Discharge/charge voltage profiles of the second cycles at a constant current density of  $2 \text{ A g}^{-1}$ .

**Table S1.** Electrochemical properties of MoO<sub>x</sub> material with different morphologies.

| Morphology                              | Phase                                            | Voltage range [V] | Current rate                                                                                | Initial C <sub>dis</sub> /C <sub>cha</sub> [mA h g <sup>-1</sup> ] | Discharge capacity [mA h g <sup>-1</sup> ] | Cycle number | Ref       |
|-----------------------------------------|--------------------------------------------------|-------------------|---------------------------------------------------------------------------------------------|--------------------------------------------------------------------|--------------------------------------------|--------------|-----------|
| nanobelts                               | orthorhombic (MoO <sub>3</sub> )                 | 0.01-3            | 0.2 C                                                                                       | 2349/1126                                                          | 730                                        | 200          | 32        |
| nanosphere                              | orthorhombic (MoO <sub>3</sub> )                 | 0.005-3           | 0.1 C                                                                                       | ~1200/-                                                            | ~1050                                      | 30           | 33        |
| nanobelt                                | orthorhombic (MoO <sub>3</sub> )                 | 0.01-3            | 1000 mA g <sup>-1</sup>                                                                     | 1000/-                                                             | 433                                        | 80           | 34        |
| yolk-shell                              | monoclinic (MoO <sub>2</sub> )                   | 0.01-3            | 50 mA g <sup>-1</sup><br>2000 mA g <sup>-1</sup>                                            | 955/793<br>450/-                                                   | ~850<br>427                                | 50           | 38        |
| nanowires                               | monoclinic (MoO <sub>2</sub> /C)                 | 0.01-3            | 1000 mA g <sup>-1</sup>                                                                     | -/356                                                              | 327                                        | 20           | 39        |
| nanoparticles embedded in carbon matrix | monoclinic (MoO <sub>2</sub> /C)                 | 0.01-3            | 50 mA g <sup>-1</sup>                                                                       | 1207/-                                                             | 734                                        | 350          | 40        |
| ant-cave-structured microballs          | orthorhombic (MoO <sub>3</sub> /C)               | 0.001-3           | 2000 mA g <sup>-1</sup><br>(about 2 C)                                                      | 1212/841                                                           | 733                                        | 300          | this work |
| porous film                             | orthorhombic (MoO <sub>3</sub> )                 | 0.02-3            | 70 mA g <sup>-1</sup>                                                                       | 1286/~900                                                          | 803                                        | 50           | S1        |
| microrod                                | hexagonal (MoO <sub>3</sub> /graphene)           | 0.01-3            | 100 mA g <sup>-1</sup>                                                                      | 1339/987                                                           | 739                                        | 30           | S2        |
| nanospheroids                           | orthorhombic (MoO <sub>3</sub> )                 | 0.005-3.5         | 0.5 C                                                                                       | ~560/-                                                             | 630                                        | 150          | S3        |
| hollow microsphere                      | orthorhombic (MoO <sub>3</sub> )                 | 0.01-3            | 1 C<br>(1117 mA g <sup>-1</sup> )                                                           | 1377/1148                                                          | 780                                        | 100          | S4        |
| nanobelts                               | orthorhombic (MoO <sub>3</sub> /C)               | 0.05-3            | 0.1 C                                                                                       | ~1300/~1100                                                        | 1064                                       | 50           | S5        |
| irregular core-shell                    | orthorhombic (MoO <sub>3</sub> /C)               | 0.01-3            | 100 mA g <sup>-1</sup>                                                                      | 1260/913                                                           | ~500                                       | 100          | S6        |
| nanocomposite                           | orthorhombic (MoO <sub>3</sub> /C)               | 0.01-3            | 0.2 C                                                                                       | 945/813                                                            | 700                                        | 120          | S7        |
| nanofiber                               | orthorhombic (MoO <sub>3</sub> /C)               | 0.01-3            | 200 mA g <sup>-1</sup>                                                                      | ~1000/-                                                            | ~500                                       | 100          | S8        |
| nanowire array                          | orthorhombic (Mo <sub>17</sub> O <sub>47</sub> ) | 0.1-3.5           | 50 mA g <sup>-1</sup><br>(first cycles<br>25 mA g <sup>-1</sup> )<br>100 mA g <sup>-1</sup> | ~770/-                                                             | ~630                                       | 20           | S9        |
| irregular shape                         | monoclinic (MoO <sub>2</sub> )                   | 0.1-3             | (activated by cycling at 120°C)                                                             | 912/842                                                            | ~800                                       | 30           | S10       |
| mesoporous                              | rutile (MoO <sub>2</sub> )                       | 0.01-3            | 0.05 C<br>(41.9 mA g <sup>-1</sup> )                                                        | 960/630                                                            | 750                                        | 30           | S11       |
| nanorods                                | monoclinic (MoO <sub>2</sub> )                   | 0.01-3            | 0.05 C                                                                                      | 775/521                                                            | 830                                        | 29           | S12       |
| hierarchical                            | monoclinic (MoO <sub>2</sub> )                   | 0.01-3            | 200 mA g <sup>-1</sup>                                                                      | 587/506                                                            | 719                                        | 20           | S13       |
| core-shell                              | monoclinic (MoO <sub>2</sub> )                   | 0.01-3            | 1 C                                                                                         | 749/608                                                            | 624                                        | 50           | S14       |

|                                                       |                                                     |        |                         |           |      |      |     |
|-------------------------------------------------------|-----------------------------------------------------|--------|-------------------------|-----------|------|------|-----|
| nanobelts                                             | monoclinic<br>(MoO <sub>2</sub> -carbon<br>coating) | 0.01-3 | 100 mA g <sup>-1</sup>  | 1279/769  | 617  | 30   | S15 |
| interconnected<br>nanocrystals                        | monoclinic<br>(MoO <sub>2</sub> -carbon<br>coating) | 0.01-3 | 200 mA g <sup>-1</sup>  | 1040/543  | ~550 | 70   | S16 |
| nanospheres                                           | monoclinic<br>(MoO <sub>2</sub> -carbon<br>coating) | 0.1-3  | 3 C                     | ~650/-    | 410  | 60   | S17 |
| nanospheres<br>(cage-like<br>structure)               | monoclinic<br>(MoO <sub>2</sub> /C)                 | 0.01-3 | 200 mA g <sup>-1</sup>  | 1152/811  | 693  | 80   | S18 |
| nanoparticles<br>distributed in<br>carbon matrix      | monoclinic<br>(MoO <sub>2</sub> /C)                 | 0.01-3 | 100 mA g <sup>-1</sup>  | 1642/1044 | 1049 | 50   | S19 |
| nanocomposite<br>with ordered<br>mesoporous<br>carbon | monoclinic<br>(MoO <sub>2</sub> /C)                 | 0.02-3 | 50 mA g <sup>-1</sup>   | 1278/784  | 689  | 50   | S20 |
| spherical<br>flowerlike<br>nanostructures             | monoclinic<br>(MoO <sub>2</sub> /MWCNT)             | 0.01-3 | 100 mA g <sup>-1</sup>  | 2270/1243 | 1143 | 200  | S21 |
| graphene<br>composite                                 | monoclinic<br>(MoO <sub>2</sub> /graphene)          | 0.01-3 | 1000 mA g <sup>-1</sup> | 468/342   | ~600 | 70   | S22 |
| graphene<br>composite                                 | monoclinic<br>(MoO <sub>2</sub> /graphene)          | 0.01-3 | 540 mA g <sup>-1</sup>  | 1387/623  | 550  | 1000 | S23 |

## References

- (S1) Zhao, G.; Zhang, N.; Sun, K. *J. Mater. Chem. A* **2013**, *1*, 221-224.
- (S2) Tang, Q.; Wang, L.; Zhu, K.; Shan, Z.; Qin, W. *Materials Letters* **2013**, *100*, 127-129.
- (S3) Lee, S. H.; Kim, Y. H.; Deshpande, R.; Parilla, P. A.; Whitney, E.; Gillaspie, D. T.; Jones, K. M.; Mahan, H.; Zhang, S.; Dillon, A. C. *Adv. Mater.* **2008**, *20*, 3627-3632.
- (S4) Zhao, X.; Cao, M.; Hu, C. *Mater. Res. Bull.* **2013**, *48*, 2289-2295.
- (S5) Hassan, M. F.; Guo, Z. P.; Chen, Z.; Liu, H. K. *J. Power Sources* **2010**, *195*, 2372-2376.
- (S6) Xia, Q.; Zhao, H.; Du, Z.; Wang, J.; Zhang, T.; Wang, J.; Lv, P. *J. Power Sources* **2013**, *226*, 107-111.
- (S7) Tao, T.; Glushenkov, A. M.; Zhang, C.; Zhang, H.; Zhou, D.; Guo, Z.; Liu, H. K.; Chen, Q.; Hu, H.; Chen, Y. *J. Mater. Chem.* **2011**, *21*, 9350-9355.
- (S8) Feng, C.; Gao, H.; Zhang, C.; Guo, Z.; Liu, H. *Electrochim. Acta* **2013**, *93*, 101-106.
- (S9) Meduri, P.; Clark, E.; Kim, J. H.; Dayalan, E.; Sumanasekera, G. U. *Nano Lett.* **2012**, *12*, 1784-1788.
- (S10) Ku, J. H.; Jung, Y. S.; Lee, K. T.; Kim, C. H.; Oh, S. M. *J. Electrochem. Soc.* **2009**,

156, A688-A693.

(S11) Shi, Y.; Guo, B.; Corr, S. A.; Shi, Q.; Hu, Y. S.; Heier, K. R.; Chen, L.; Seshadri, R.; Stucky, G. D. *Nano Lett.* **2009**, *9*, 4215-4220.

(S12) Guo, B.; Fang, X.; Li, B.; Shi, Y.; Quyang, C.; Hu, Y. S.; Wang, Z.; Stucky, G. D.; Chen, L. *Chem. Mater.* **2012**, *24*, 457-463.

(S13) Sun, Y.; Hu, X.; Yu, J. C.; Li, Q.; Luo, W. Yuan, L.; Zhang, W.; Huang, Y. *Energy Environ. Sci.* **2011**, *4*, 2870-2877.

(S14) Zhao, X.; Cao, M.; Liu, B.; Tian, Y.; Hu, C. *J. Mater. Chem.* **2012**, *22*, 13334-13340.

(S15) Yang, L.; Liu, L.; Zhu, Y.; Wang, X.; Wu, Y. *J. Mater. Chem.* **2012**, *22*, 13148-13152.

(S16) Zhou, L.; Wu, H. B.; Wang, Z.; Lou, X. W. *ACS Appl. Mater. Interfaces* **2011**, *3*, 4853-4857.

(S17) Wang, Z.; Chen, J. S.; Zhu, T.; Madhavi, S.; Lou, X. W. *Chem. Commun.* **2010**, *46*, 6906-6908.

(S18) Liu, B.; Zhao, X.; Tian, Y.; Zhao, D.; Hu, C.; Cao, M. *Phys. Chem. Chem. Phys.* **2013**, *15*, 8831-8837.

(S19) Chen, A.; Li, C.; Tang, R.; Yin, L.; Qi, Y. *Phys. Chem. Chem. Phys.* **2013**, *15*, 13601-13610.

(S20) Zeng, L.; Zheng, C.; Deng, C.; Ding, X.; Wei, M. *ACS Appl. Mater. Interfaces* **2013**, *5*, 2182-2187.

(S21) Bhaskar, A.; Deepa, M.; Rao, T. N. *ACS Appl. Mater. Interfaces* **2013**, *5*, 2555-2566.

(S22) Sun, Y.; Hu, X.; Luo, W.; Huang, Y. *ACS Nano* **2011**, *5*, 7100-7107.

(S23) Bhaskar, A.; Deepa, M.; Rao, T. N.; Varadaraju, U. V. *J. Power Sources* **2012**, *216*, 169-178.
